# Supplementary material for: The framework for systematic reviews on psychological risk factors for persistent somatic symptoms and related syndromes and disorders (PSY-PSS)
Source: Front Psychiatry. 2023 Apr 5;14:1142484. doi: 10.3389/fpsyt.2023.1142484 (PMC10113674; doi:10.3389/fpsyt.2023.1142484)
Supplement: Supplementary file 1 [file Table_1.xlsx]

## Sheet: Search terms
Search terms for persistent somatic symptoms and related syndromes and disorders
Developed by Anne Toussaint, Paul Hüsing, Abigail Smakowski, Maria Kleinstäuber, Bernd Löwe & Meike Shedden-Mora
This list is based on: Berezowski, L., Ludwig, L., Martin, A., Löwe, B., & Meike C. Shedden-Mora. (2021). Early psychological interventions for somatic symptom disorder and functional somatic syndromes: a systematic review and meta-analysis. Psychosomatic Medicine, 84(3), 325-338. doi:10.1097/PSY.0000000000001011
This list is part of the PSY-PSS framework for systematic reviews on psychological risk factors for persistent somatic symptoms and related syndromes and disorders (PSY-PSS)
Address for correspondence: Meike Shedden-Mora, Medical School Hamburg, meike.shedden-mora@medicalschool-hamburg.de
Specialty	Condition	Related conditions
General (non-specific) Terms	Functional	Functional disorder
		Functional symptom
		Functional syndrome
		Functional somatic
		Functional illness
		Non-organic
		Psychogenic
General Practitioner	Subjective symptoms	Subjective stomach pain
		Subjective back pain
		Subjective pain
		Subjective headache
		Subjective chest pain
		Subjecitve dizziness
		Subjective fainting
		Subjecitve shortness of breath
		Subjective constipation
		Subjective nausea
	Medically unexplained	Medically unexplained
		Organically unexplained
		Psychosomatic
		Somatoform
		Persistent physical symptoms
		Persistent somatic symptoms
Psychiatric/Psychosomatic	Dissociative Disorders - ICD-11	Dissociative neurological symptom disorder
		Dissociative amnesia
	Dissociative Disorders- ICD-10	Mixed dissociative disorder
		Dissociative fugue
		Dissociative stupor
		Dissociative motor disorder
		Dissociative convulsion
		Dissociative anaesthesia
		Dissociative sensory loss
		Other dissociative disorder
	Multisomatoform disorder	Multisomatoform
	Somatization disorder	Somatization
		Somatisation
		Briquet syndrome
	Pain disorder	Pain disorder
	Conversion disorder	Conversion disorder
		Hysteria
		Hysteric
	Somatic symptom disorder	Somatic symptom disorder
		Somatic symptom distress
		Somatic symptom and related disorders
	Bodily distress disorder	Bodily distress disorder
		Bodily distress syndrome
		Bodily distress
		Body distress
		Bodily stress
		Body stress
	Culture-bound syndrome	Culture-bound syndrome
		Culture-specific syndrome
		Culture-bound symptom
		Culture-specific symptom
Allergology	Food intolerance	Food intolerance
		Food sensitivity
		Food hypersensitivity
		Pseudo-allergy
		Functional food intolerance
		Functional food sensitivity
		Functional food hypersensitivity
		Functional food allergy
	Multiple chemical sensitivity	chemical sensitivity
		Idiopathic environmental
	Sick building syndrome	Sick building
	Persian gulf syndrome	Persian gulf syndrome
		Gulf war syndrome
	Amalgam hypersensitivity	Amalgam hypersensitivity
		Functional amalgam hypersensitivity
		Functional amalgam toxicity
	Implant intolerance	Implant intolerance
	Prothesis intolerance	Prothesis intolerance
	Aerotoxic syndrome	Aerotoxic
		Cabin contamination
	Wind turbine syndrome	Wind turbine syndrome
		Wind farm syndrome
	Electromagnetic hypersensitivity	Electromagnetic hypersensitivity
		Idiopathic environmental intolerance attributed to electromagnetic fields
		Electrohypersensitivity
		Electro-sensitivity
		Electrical sensitivity
		Wi-Fi allergy
Anesthesiology	Idiopathic pain	Idiopathic pain
		Panalgesia
		Psychogenic pain
		Functional pain
		Unspecific pain
	Chronic postoperative pain	Chronic postoperative
Cardiology	Atypical chest pain	Atypical chest pain
		Nonspecific chest pain
		Non-specific chest pain
		Noncardiac chest pain
		Non-cardiac chest pain
		Functional chest pain
	Palpitations with normal investigations	Psychogenic palpitation
		Functional palpitation
	Syndrome X	Syndrome X
		Microvascular angina
Dermatology	Psychogenic skin disease	Psychogenic skin disease
		Psychogenic pruritus
		Functional skin
Endocrinology	Hypoglycaemia	Psychogenic hypoglycaemia
		Psychogenic hypoglycemia
		Idiopathic postprandial syndrome
		Functional hypoglycaemia
		Functional hypoglycemia
Gastroenterology	Functional gastrointestinal disorders	Functional gastrointestinal
	Disorders of the gut-brain-interaction	brain-gut interaction
	Functional bowel syndrome	Irritable bowel
		Irritable colon
		IBS
		irritable bowel syndrome
		Functional chest pain
		Functional heartburn
		Reflux hypersensitivity
		Functional dysphagia
		Belching disorder
		Rumination syndrome
		Chronic nausea vomiting syndrome
		Cyclic vomiting syndrome
		Functional constipation
		Functional diarrhea
		Functional bloating
		Functional distention
		Functional bowel disorder
		Functional abdominal pain
		Centrally mediated abdominal pain syndrome
		Functional biliary pain
		Levator ani syndrome
		unspecified functional anorectal pain
		Proctalgia fugax
		Mucous colitis
	Nonulcer dyspepsia	Nonulcer dyspepsia
		Functional dyspepsia
	Functional Abdominal pain	Functional abdominal
		Psychogenic abdominal
	Functional colonical disease	Functional colonical
	Functional disorders of swallowing	Functional swallowing
		Psychogenic dysphagia
	Globus syndrome	Globus syndrome
		Globus hystericus
		Globus pharyngeus
		Functional globus
		Globus sensation
Gynecology & Urology	Premenstrual syndrome	Premenstrual syndrome
		Late luteal phase dysphoria
		Premenstrual tension
	Functional urologic disorders	Functional urologic
		Functional urinary
		Functional micturition
		Micturition dysfunction
		Psychogenic urinary retention
		Functional urinary retention
	Paruresis	Paruresis
		Shy-bladder
		Bashful bladder
	Dysfunctional voiding	Dysfunctional voiding
		Hinman-Allen
		Nonneurogenic neurogenic bladder
	Idiopathic overactive bladder	Idiopathic overactive bladder
		Irritable bladder
	Interstitital cystitis	Interstitial cystitis
	Urethral syndrome	Urethral syndrome
	Chronic pelvic pain syndrome	Chronic pelvic pain
		CPPS
	Pelvic arthropathy	Pelvic arthropathy
Infectiology	Chronic lyme disease	Chronic lyme
	Candida hypersensitivity	Candida hypersensitivity
		Candida syndrome
	Chronic rhinopharyngitis	Chronic rhinopharyngitis
Neurology		Functional neurologic
	Functional seizures	Functional seizure
		Non-epileptic seizure
		PNES
		Pseudoseizure
		Pseudo-seizure
		non-specific seizure
		Hysterical seizure
		Non-epileptic attack
		Dissociative seizure
		Dissociative attack
	Functional voice disorder	Functional voice
		Functional dysphonia
		Functional aphonia
		Muscle tension voice disorder
		Psychogenic voice
	Functional motor disorder	Functional motor
		Functional movement
		Functional sensorimotor
		Functional weakness
		Functional leg
		Functional limb
		Functional arm
		Functional paralysis
		Functional tremor
		Functional dystonia
		Posttraumatic painful torticollis
		Functional jerk
		Functional tic
		Functional myoclonus
		Functional paroxysmal
		Functional gait
		Movement disorder mimic
		Neurologic mimic
		Musculoskeletal mimic
		Biomechanical mimic
		Isolated disequilibrium
		Functional balance
		Functional parkinsonism
	Functional eye movement disorder	Functional eye
		Functional convergence spasm
		Functional convergence paralysis
		Functional gaze limitation
		Functional eye oscillation
		Functional nystagmus
		Functional opsoclonus
		Functional tonic eye deviation
		Functional oculogyric crisis
		Functional diplopia
		Functional tonic gaze deviation
	Functional facial movement disorder	Functional facial
		Functional tongue
	Functional tongue movement disorder	Psychogenic blepharospasm
		Functional blepharospam
		Functional oromandibular dystonia
		Functional facial dystonia
	Functional sensory symptoms	Functional sensory
		Functional hypoesthesia
		Functional Hyperesthesia
		Functional Hemihyperesthesia
		Functional Paresthesia
	Functional visual symptoms	Functional visual loss
	Functional speech disorder	Functional speech
		Functional stuttering
		Functional dysfluency
		Functional articulation
		Prosodic abnormality
		Foreign accent syndrome
		Abnormal resonance
		Hypernasality
	Functional memory disorder	Functional memory
	Functional cognitive disorder	Functional cognitive
		Functional amnesia
	Functional dizziness	Functional dizziness
		Phobic postural vertigo
		Chronic subjective dizziness
		Persistent postural-perceptual dizziness
		Subjective dizziness
		Chronic dizziness
		Persistent dizziness
	Functional stroke	Functional stroke
		Stroke mimic
	Tension headache	Tension headache
		Tension-type headache
		Tension type headache
		Tension-vascular headache
		Tension vascular headache
		Stress headache
		Functional headache
	Atypical face pain	Atypical face pain
		Myofacial pain
		Functional face pain
	Central sensitivity syndrome	Central sensitivity
	Post-concussion syndrome	Post concussion
		Post-traumatic complaints
	Chronic fatigue syndrome	CFS
		Chronic fatigue
	Myalgic encephalomyelitis	ME/CFS
		Myalgic encephalomyelitis
	Neurasthenia	Neurasthenia
	Post-viral fatigue syndrome	Post-viral fatigue
		chronic epstein barr virus
		chronic mononucleosis
		chronic infectious mononucleosis like
		chronic fatigue and immune
		effort syndrome
		neuromyasthenia
		postviral syndrome
		post-viral syndrome
		post viral syndrome
		post infectious fatigue
		Fatigue syndrome
		Psychogenic fatigue
		systemic exertion intolerance
Oral medicine/Otorhinolaryngology	Temporomandibular joint disorder	Temporomandibular joint
		Temporomandibular disorder
		Temporo-mandibular disorder
		Temporomandibular dysfunction
		Temporo-mandibular dysfunction
		TMJD
		Craniomandibular disorder
		Cranio-mandibular disorder
	Atypical odontalgia	Atypical odontalgia
		Functional odontalgia
	Psychogenic gagging	Psychogenic gagging
		Functional gagging
	Burning mouth	Burning mouth
		Glossalgia
		Glossodynia
		Glossopyrosis
	Bruxism	Bruxism
Orthopedics	Repetitive strain injury	Repetitive strain
		Repetition strain
		Overuse injury
		Overuse syndrome
		Repetitive stress
		Repetitive motion
	Chronic whiplash syndrome	Chronic whiplash
		Whiplash associated
		Functional neck pain
Respiratory Medicine	Hyperventilation syndrome	Hyperventilation syndrome
Rheumatology	Fibromyalgia	Fibromyalgia
		FMS
		Chronic widespread pain
		Widespread musculoskeletal pain
		Myofascial pain
	Chronic low back pain	Nonspecific back pain
		Low back pain
		Functional back pain
	Chronic pain	Chronic pain
	Persistent pain	Persistent pain
	Chronic intractable benign pain syndrome	Chronic intractable benign pain
